# Supplementary material for: Development of porous carbon nanofibers from electrospun polyvinylidene fluoride for CO2capture
Source: Royal Society of Chemistry journal article supplement (doi:10.1039/c4ra11290c), 2014-11-06
Supplement: c4ra11290c1.pdf [file c4ra11290c1.pdf]

ARTICLE

**Electronic Supplementary Information (ESI)** for RSC Adv.

**Development of porous carbon nanofibers from electrospun polyvinylidene fluoride**

*Seok-Min Hong, Sung Hyun Kim, Bo Gyeong Jeong, Seong Mu Jo, Ki Bong Lee\**

Department of Chemical and Biological Engineering, Korea University, 145 Anam-ro, Seongbuk-gu, Seoul 136-713, Republic of Korea  
Tel.: +82 2 3290 4851; FAX: +82 2 926 6102; E-mail: kibonglee@korea.ac.kr

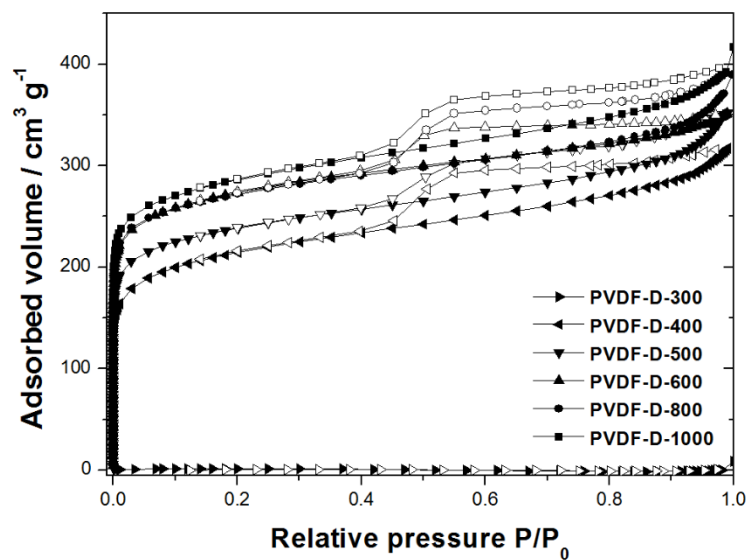

**Fig. S1.** N<sub>2</sub> adsorption (solid symbols) and desorption (open symbols) at 77 K on PVDF-based CNFs.

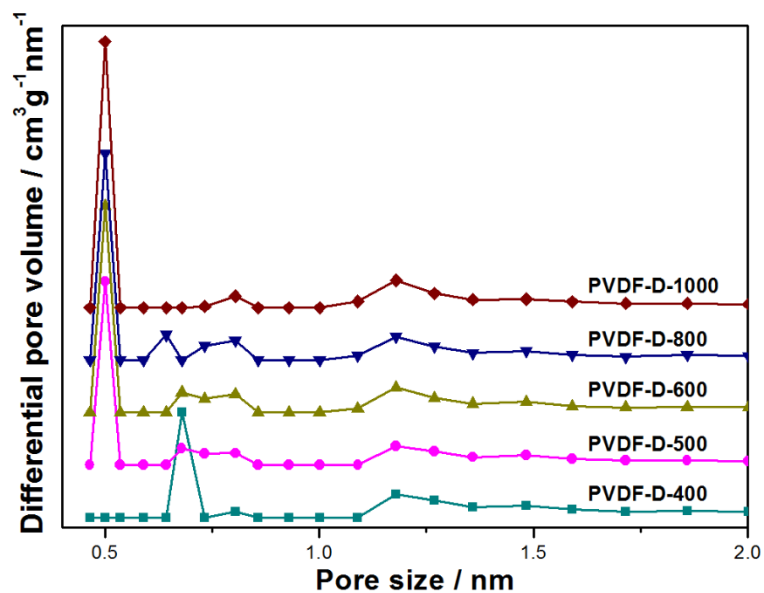

**Fig. S2.** DFT pore size distribution of PVDF-based CNFs.

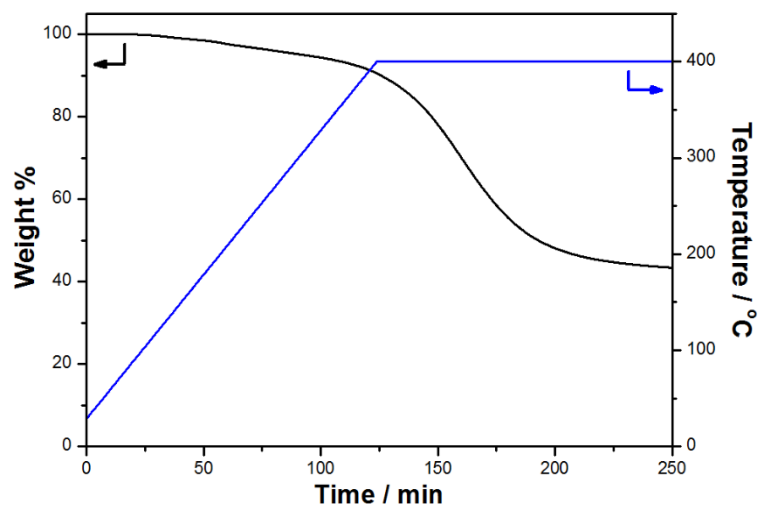

**Fig. S3.** Weight change of PVDF-D during the two-step thermal treatment; the temperature is increased at a heating rate of  $3\text{ }^{\circ}\text{C min}^{-1}$  to  $400\text{ }^{\circ}\text{C}$ , and the system is maintained under isothermal conditions at  $400\text{ }^{\circ}\text{C}$  for 2 h.

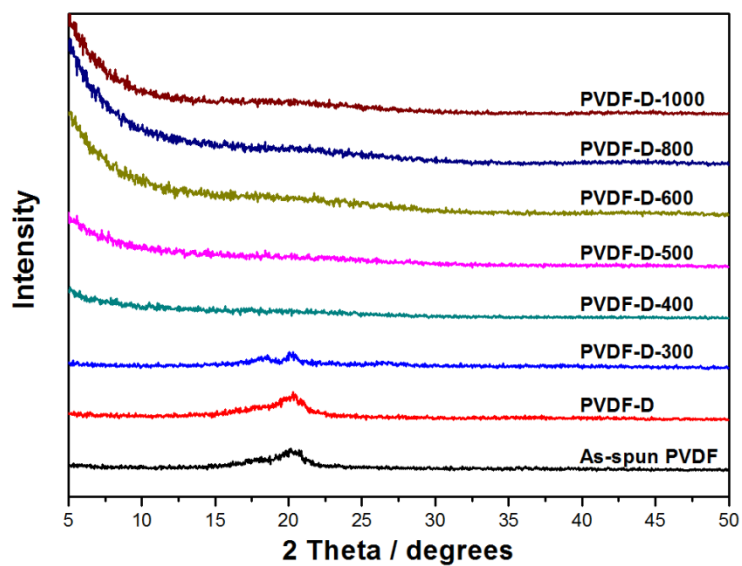

**Fig. S4.** X-ray diffraction patterns of as-spun PVDF, PVDF-D, and PVDF-based CNFs.

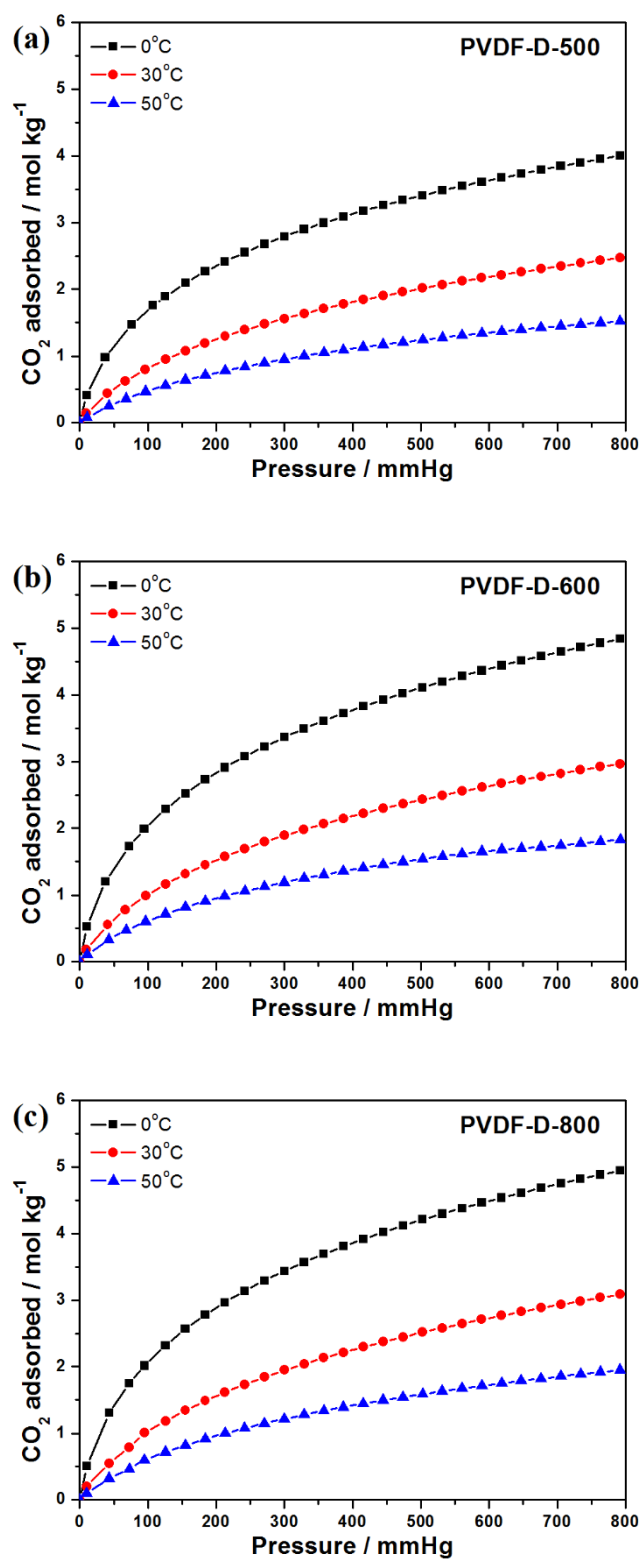

**Fig. S5.** CO<sub>2</sub> adsorption isotherms at 0, 30, and 50 °C for (a) PVDF-D-500, (b) PVDF-D-600, and (c) PVDF-D-800.

**Table S1.** Comparison of CO<sub>2</sub> adsorption capacity for different carbonaceous adsorbents, measured at the pressure of ~1 bar.

| Sample                        | S <sub>BET</sub><br>(m <sup>2</sup> g <sup>-1</sup> ) | Temperature<br>(°C) | CO <sub>2</sub> adsorption capacity<br>(mol kg <sup>-1</sup> ) | Reference        |
|-------------------------------|-------------------------------------------------------|---------------------|----------------------------------------------------------------|------------------|
| HCM-DAH-1-900-1 <sup>a)</sup> | 1392                                                  | 25                  | 3.3                                                            | 35               |
| A-NMC <sup>b)</sup>           | 1417                                                  | 25                  | 3.2                                                            | 36               |
| aC <sup>c)</sup>              | 1857                                                  | 25                  | 2.9                                                            | 37               |
| PTP-OMC-I <sup>c)</sup>       | 453                                                   | 25                  | 2.7                                                            | 38               |
| GKOSA50 <sup>d)</sup>         | 1079                                                  | 25                  | 2.4                                                            | 39               |
| MFB-600 <sup>e)</sup>         | 490                                                   | 25                  | 2.3                                                            | 40               |
| <b>PVDF-D-1000</b>            | <b>1065</b>                                           | <b>30</b>           | <b>3.1</b>                                                     | <b>This work</b> |

<sup>a)</sup> CO<sub>2</sub> activated carbon monolith, <sup>b)</sup> KOH activated mesoporous carbon, <sup>c)</sup> ordered mesoporous carbon, <sup>d)</sup> activated carbon, and <sup>e)</sup> silica-templated porous carbon.
